# Supplementary material
Source: PubMed Central journal article supplement (PMC8641974)
Supplement: mmc1.pdf [file mmc1.pdf]

## Item S1. Details of analytical methods for the AKI-KRT subcohort

### A. Missing variables

#### Missing variables

|                                              | Missing     |
|----------------------------------------------|-------------|
| Age                                          | 0           |
| Sex                                          | 0           |
| Race                                         | 190 (21.7%) |
| Ethnicity                                    | 103 (11.8%) |
| Diabetes status                              | 0           |
| Baseline creatinine                          | 0           |
| Initial mode of KRT                          | 8 (0.9%)    |
| Albumin on KRT day 1                         | 155 (17.7%) |
| Arterial pH on KRT day 1                     | 98 (11.2%)  |
| UOP on KRT day 1                             | 120 (13.7%) |
| Vasopressors/inotropes on KRT day 1          | 129 (14.7%) |
| Major cardiac event prior to or on KRT day 1 | 0           |

### B. Imputation of missing values

Imputation by last available value was used to impute values for albumin, arterial pH, urine output, and number of vasopressors/inotropes needed on KRT day 1. For arterial pH, urine output, and vasopressors/inotropes needed, imputation by last available value was restricted to within two days prior to KRT initiation. After close examination of the manually entered data, remaining missing values for vasopressors/inotropes needed were imputed as 0.

#### Imputation of missing values

|                                                      | Missing     | Missing after imputation as described |
|------------------------------------------------------|-------------|---------------------------------------|
| Albumin on KRT day 1                                 | 155 (17.7%) | 24 (2.7%)                             |
| Arterial pH on KRT day 1                             | 98 (11.2%)  | 53 (6.1%)                             |
| UOP on KRT day 1                                     | 120 (13.7%) | 89 (10.2%)                            |
| Number of vasopressors/inotropes needed on KRT day 1 | 129 (14.7%) | 0 (0.0%)                              |

Other remaining missing values were imputed by multiple imputation (MI).

For patients with unknown race, the arithmetic mean of their eGFR-AA and eGFR-NAA was used for analyses. Of note, all analyses stratified eGFR by CKD stage, and race would have impacted the eGFR stratum of 18 patients, out of the 190 patients with missing race.

### C. Imputation of date of recovery

While date of recovery was not collected, every patient’s treatment with KRT was recorded for the first 14 days of ICU admission. The following rules for imputation of date of recovery were applied, see the table below for examples illustrating these rules.

1. For patients discharged by ICU day 14, the last recorded date of dialysis was imputed as the date of recovery. (Example 1)
2. For patients discharged between ICU day 15 and 21, if they did not receive KRT on ICU days 12-14, the last recorded date of dialysis was imputed as the date of recovery. (Example 2)
3. For patients off dialysis from day 8 to day 14, if the last available creatinine was less than the creatinine on the last recorded day of dialysis, the last recorded date of dialysis was imputed as the date of recovery. (Example 3)
4. One of the authors (CMH) reviewed the creatinine trend for the remaining five patients who did not receive dialysis from day 8 to 14, and for 2 additional patients, the last recorded date of dialysis was imputed as the date of recovery.
5. For all remaining patients with recovery by the date of discharge, date of recovery was imputed to be date of discharge.

#### Imputation of date of recovery

| ICU Day    | 1    | 2    | 3    | 4    | 5   | 6    | 7    | 8   | 9    | 10   | 11   | 12   | 13   | 14   | Day of discharge | Imputed day of recovery | No. of subjects this rule applied to |
|------------|------|------|------|------|-----|------|------|-----|------|------|------|------|------|------|------------------|-------------------------|--------------------------------------|
| Example 1  |      |      |      |      |     |      |      |     |      |      |      |      |      |      | 12               | 5                       | 6                                    |
| Example 2  |      |      |      |      |     |      |      |     |      |      |      |      |      |      | 17               | 10                      | 11                                   |
| Example 3  |      |      |      |      |     |      |      |     |      |      |      |      |      |      | 27               | 6                       | 9                                    |
| Cr (mg/dL) | 3.41 | 4.89 | 7.17 | 7.67 | 4.7 | 4.35 | 3.51 | 4.1 | 3.93 | 3.61 | 3.29 | 2.88 | 2.94 | 2.32 |                  |                         |                                      |

Shaded blocks indicate receipt of KRT

**Table S1. Multinomial logistic regression model, with discharge without KRT as the reference**

| Outcome                                             | Univariate              |                      | Primary Multivariable Model |                     | Parsimonious Multivariable Model |                     | Expanded Multivariable Model |                      |
|-----------------------------------------------------|-------------------------|----------------------|-----------------------------|---------------------|----------------------------------|---------------------|------------------------------|----------------------|
|                                                     | Nonrecovery vs Recovery | Death vs Recovery    | Nonrecovery vs Recovery     | Death vs Recovery   | Nonrecovery vs Recovery          | Death vs Recovery   | Nonrecovery vs Recovery      | Death vs Recovery    |
| Age, per decade of life                             | 1.05 (0.87, 1.28)       | 1.25 (1.10, 1.43) *  | 1.02 (0.82, 1.27)           | 1.21 (1.04, 1.41) * | 1.02 (0.82, 1.26)                | 1.26 (1.09, 1.45) * | 1.03 (0.83, 1.29)            | 1.19 (1.02, 1.38) *  |
| Female                                              | 0.93 (0.54, 1.58)       | 0.84 (0.59, 1.20)    | 0.67 (0.38, 1.21)           | 0.83 (0.56, 1.22)   | 0.75 (0.43, 1.32)                | 0.85 (0.59, 1.23)   | 0.65 (0.36, 1.17)            | 0.85 (0.57, 1.26)    |
| Black race                                          | 1.29 (0.73, 2.25)       | 0.67 (0.47, 0.97) *  | 1.08 (0.55, 2.10)           | 0.64 (0.41, 1.00)   | 1.18 (0.61, 2.30)                | 0.70 (0.46, 1.07)   | 1.04 (0.53, 2.06)            | 0.66 (0.42, 1.05)    |
| Hispanic ethnicity                                  | 0.75 (0.37, 1.52)       | 1.05 (0.70, 1.56)    | 0.95 (0.41, 2.21)           | 0.91 (0.55, 1.49)   | 0.98 (0.42, 2.26)                | 1.00 (0.63, 1.59)   | 0.93 (0.39, 2.22)            | 0.97 (0.58, 1.62)    |
| DM                                                  | 1.11 (0.67, 1.82)       | 0.84 (0.60, 1.16)    | 1.00 (0.58, 1.71)           | 0.82 (0.57, 1.17)   | 0.96 (0.57, 1.63)                | 0.80 (0.57, 1.13)   | 0.98 (0.56, 1.71)            | 0.82 (0.56, 1.18)    |
| Baseline eGFR, mL/min/1.73m <sup>2</sup>            |                         |                      |                             |                     |                                  |                     |                              |                      |
| >60                                                 | Ref                     | Ref                  | Ref                         | Ref                 | Ref                              | Ref                 | Ref                          | Ref                  |
| 31-60                                               | 2.04 (1.08, 3.83) *     | 1.28 (0.86, 1.92)    | 2.09 (1.09, 4.04) *         | 1.35 (0.88, 2.09)   | 2.01 (1.05, 3.83) *              | 1.22 (0.81, 1.85)   | 2.09 (1.07, 4.08) *          | 1.39 (0.89, 2.17)    |
| 16-30                                               | 4.01 (1.94, 8.28) *     | 0.93 (0.53, 1.64)    | 4.27 (1.99, 9.17) *         | 0.91 (0.49, 1.67)   | 4.13 (1.96, 8.71) *              | 0.95 (0.53, 1.70)   | 3.91 (1.74, 8.78) *          | 1.02 (0.54, 1.95)    |
| ≤ 15                                                | 9.68 (3.52, 26.57) *    | 2.47 (1.02, 5.95) *  | 8.69 (3.07, 24.55) *        | 2.60 (1.04, 6.47) * | 9.89 (3.58, 27.32) *             | 2.54 (1.04, 6.17) * | 8.86 (3.08, 25.49) *         | 2.61 (1.03, 6.58) *  |
| Initial mode of KRT, CKRT vs iHD/PD/Other           | 0.82 (0.48, 1.40)       | 0.77 (0.54, 1.10)    | 1.04 (0.58, 1.85)           | 0.73 (0.50, 1.08)   |                                  |                     | 1.10 (0.60, 2.03)            | 0.75 (0.50, 1.13)    |
| Albumin on KRT day 1, per 0.5 (g/dL)                | 1.17 (0.94, 1.45)       | 0.88 (0.76, 1.01)    | 1.21 (0.96, 1.52)           | 0.89 (0.76, 1.04)   |                                  |                     | 1.20 (0.95, 1.52)            | 0.91 (0.77, 1.07)    |
| Arterial pH on KRT day 1, per 0.1                   | 1.12 (0.86, 1.47)       | 0.66 (0.56, 0.79) *  | 1.21 (0.90, 1.62)           | 0.72 (0.60, 0.87) * |                                  |                     | 1.20 (0.88, 1.64)            | 0.73 (0.59, 0.89) *  |
| UOP on KRT day 1 (mL/day)                           |                         |                      |                             |                     |                                  |                     |                              |                      |
| 500+                                                | Ref                     | Ref                  | Ref                         | Ref                 |                                  |                     | Ref                          | Ref                  |
| 50-499                                              | 1.87 (1.05, 3.33) *     | 1.75 (1.22, 2.52) *  | 2.10 (1.14, 3.88) *         | 1.42 (0.96, 2.10)   |                                  |                     | 2.18 (1.17, 4.06) *          | 1.41 (0.94, 2.12)    |
| <50                                                 | 4.14 (1.85, 9.30) *     | 4.45 (2.37, 8.35) *  | 4.02 (1.72, 9.39) *         | 3.78 (1.96, 7.27) * |                                  |                     | 4.10 (1.71, 9.81) *          | 3.88 (1.99, 7.56) *  |
| Vasopressors/inotropes on KRT day 1                 |                         |                      |                             |                     |                                  |                     |                              |                      |
| 0                                                   | Ref                     | Ref                  | Ref                         | Ref                 |                                  |                     | Ref                          | Ref                  |
| 1                                                   | 0.90 (0.51, 1.59)       | 1.22 (0.82, 1.81)    | 0.94 (0.51, 1.74)           | 1.13 (0.74, 1.74)   |                                  |                     | 1.12 (0.58, 2.18)            | 0.94 (0.60, 1.47)    |
| ≥2                                                  | 0.84 (0.42, 1.70)       | 2.18 (1.38, 3.44) *  | 0.87 (0.40, 1.86)           | 1.76 (1.06, 2.92) * |                                  |                     | 1.01 (0.45, 2.28)            | 1.40 (0.83, 2.38)    |
| Major cardiac event prior to or on KRT day 1        | 1.02 (0.25, 4.16)       | 2.65 (1.11, 6.29) *  | 1.07 (0.25, 4.62)           | 2.47 (0.99, 6.18)   |                                  |                     | 1.32 (0.30, 5.86)            | 2.28 (0.88, 5.91)    |
| Steroid administration prior to or on KRT day 1     | 0.60 (0.32, 1.11)       | 1.78 (1.24, 2.57) *  |                             |                     |                                  |                     | 0.60 (0.31, 1.18)            | 1.66 (1.11, 2.48) *  |
| Tocilizumab administration prior to or on KRT day 1 | 0.99 (0.53, 1.82)       | 0.78 (0.52, 1.18)    |                             |                     |                                  |                     | 1.41 (0.71, 2.78)            | 0.80 (0.50, 1.27)    |
| Remdesivir administration prior to or on KRT day 1  | 0.45 (0.13, 1.62)       | 0.96 (0.50, 1.84)    |                             |                     |                                  |                     | 0.86 (0.22, 3.26)            | 0.80 (0.38, 1.66)    |
| Mechanical ventilation on KRT day 1                 | 0.46 (0.20, 1.03)       | 4.17 (1.80, 9.68) *  |                             |                     |                                  |                     | 0.75 (0.26, 2.11)            | 4.47 (1.67, 11.98) * |
| Platelets (x10 <sup>3</sup> /μL)                    |                         |                      |                             |                     |                                  |                     |                              |                      |
| 150+                                                | Ref                     | Ref                  |                             |                     |                                  |                     | Ref                          | Ref                  |
| 100-149                                             | 0.77 (0.31, 1.92)       | 1.56 (0.92, 2.66)    |                             |                     |                                  |                     | 0.64 (0.25, 1.65)            | 1.43 (0.81, 2.53)    |
| <100                                                | 1.20 (0.28, 5.13)       | 3.94 (1.55, 10.02) * |                             |                     |                                  |                     | 0.83 (0.18, 3.87)            | 3.71 (1.37, 10.02) * |
| Bilirubin (mg/dL)                                   |                         |                      |                             |                     |                                  |                     |                              |                      |
| <1.2                                                | Ref                     | Ref                  |                             |                     |                                  |                     | Ref                          | Ref                  |
| 1.2-1.9                                             | 0.55 (0.23, 1.32)       | 1.41 (0.87, 2.29)    |                             |                     |                                  |                     | 0.72 (0.28, 1.83)            | 1.11 (0.65, 1.89)    |
| ≥2.0                                                | 0.67 (0.23, 1.91)       | 1.79 (0.99, 3.24)    |                             |                     |                                  |                     | 0.71 (0.23, 2.22)            | 1.54 (0.79, 3.02)    |

Each cell displays OR (95% CI) p-value. eGFR, estimated glomerular filtration rate; KRT, kidney replacement therapy; CKRT, continuous kidney replacement therapy; iHD, intermittent hemodialysis; PD, peritoneal dialysis; UOP, urine output  
All outcomes here were assessed upon discharge.

\* p < 0.05

**Table S2. Ordinal logistic regression model**

| Outcome                                             | Univariate                       |                      | Primary Multivariable Model      |                     | Parsimonious Multivariable Model |                     | Expanded Multivariable Model     |                     |
|-----------------------------------------------------|----------------------------------|----------------------|----------------------------------|---------------------|----------------------------------|---------------------|----------------------------------|---------------------|
|                                                     | Nonrecovery or Death vs Recovery | Death vs Survival    | Nonrecovery or death vs Recovery | Death vs Survival   | Nonrecovery or death vs Recovery | Death vs Survival   | Nonrecovery or death vs Recovery | Death vs Survival   |
| Age, per 10 years                                   | 1.22 (1.07, 1.39) *              | 1.23 (1.10, 1.38) *  | 1.19 (1.01, 1.39) *              | 1.21 (1.06, 1.38) * | 1.23 (1.07, 1.41) *              | 1.24 (1.10, 1.40) * | 1.36 (1.16, 1.61) *              | 1.35 (1.18, 1.54) * |
| Female                                              | 0.85 (0.60, 1.21)                | 0.86 (0.63, 1.18)    | 0.74 (0.49, 1.12)                | 1.02 (0.72, 1.44)   | 0.82 (0.57, 1.19)                | 0.97 (0.70, 1.34)   | 0.82 (0.54, 1.27)                | 1.11 (0.78, 1.57)   |
| Black race                                          | 0.74 (0.52, 1.05)                | 0.62 (0.45, 0.86) *  | 0.75 (0.48, 1.18)                | 0.59 (0.39, 0.89) * | 0.77 (0.52, 1.15)                | 0.66 (0.45, 0.95) * | 0.92 (0.61, 1.38)                | 0.82 (0.57, 1.18)   |
| Hispanic ethnicity                                  | 1.00 (0.67, 1.49)                | 1.14 (0.79, 1.65)    | 0.92 (0.55, 1.54)                | 0.88 (0.54, 1.41)   | 0.98 (0.63, 1.53)                | 0.99 (0.64, 1.51)   | 1.01 (0.61, 1.68)                | 1.04 (0.67, 1.62)   |
| Diabetes                                            | 0.87 (0.63, 1.20)                | 0.81 (0.61, 1.07)    | 0.84 (0.58, 1.23)                | 0.84 (0.62, 1.15)   | 0.86 (0.61, 1.21)                | 0.81 (0.60, 1.09)   | 0.95 (0.66, 1.38)                | 0.91 (0.67, 1.24)   |
| Baseline eGFR, mL/min/1.73m <sup>2</sup>            |                                  |                      |                                  |                     |                                  |                     |                                  |                     |
| >60                                                 | Ref                              | Ref                  | Ref                              | Ref                 | Ref                              | Ref                 | Ref                              | Ref                 |
| 30-60                                               | 1.35 (0.91, 2.01)                | 1.05 (0.74, 1.49)    | 1.39 (0.90, 2.14)                | 1.07 (0.74, 1.57)   | 1.27 (0.85, 1.91)                | 1.01 (0.70, 1.45)   | 1.16 (0.74, 1.84)                | 0.92 (0.63, 1.35)   |
| 15-29                                               | 1.21 (0.70, 2.09)                | 0.56 (0.36, 0.89) *  | 1.24 (0.69, 2.20)                | 0.53 (0.32, 0.87) * | 1.26 (0.72, 2.21)                | 0.58 (0.36, 0.93) * | 1.26 (0.68, 2.34)                | 0.70 (0.42, 1.19)   |
| <15                                                 | 3.12 (1.31, 7.40) *              | 0.86 (0.49, 1.49)    | 3.32 (1.37, 8.06) *              | 0.91 (0.51, 1.65)   | 3.27 (1.37, 7.82) *              | 0.88 (0.50, 1.54)   | 1.31 (0.66, 2.59)                | 0.80 (0.46, 1.40)   |
| Initial mode of KRT, CKRT vs iHD/PD/Other           | 0.78 (0.55, 1.11)                | 0.83 (0.61, 1.12)    | 0.86 (0.57, 1.31)                | 0.68 (0.48, 0.95) * |                                  |                     | 0.98 (0.63, 1.50)                | 0.90 (0.64, 1.28)   |
| Albumin on KRT day 1, per 0.5 (g/dL)                | 0.92 (0.79, 1.05)                | 0.84 (0.74, 0.95) *  | 0.99 (0.84, 1.16)                | 0.83 (0.72, 0.95) * |                                  |                     | 0.95 (0.80, 1.11)                | 0.84 (0.73, 0.97) * |
| Arterial pH on KRT day 1, per 0.1                   | 0.73 (0.61, 0.87) *              | 0.64 (0.55, 0.74) *  | 0.80 (0.65, 0.98) *              | 0.67 (0.57, 0.80) * |                                  |                     | 0.98 (0.81, 1.19)                | 0.98 (0.85, 1.14)   |
| UOP on KRT day 1 (mL/day)                           |                                  |                      |                                  |                     |                                  |                     |                                  |                     |
| >500                                                | Ref                              | Ref                  | Ref                              | Ref                 |                                  |                     | Ref                              | Ref                 |
| 50-500                                              | 1.77 (1.24, 2.52) *              | 1.46 (1.06, 2.02) *  | 1.65 (1.08, 2.52) *              | 1.12 (0.78, 1.61)   |                                  |                     | 1.17 (0.76, 1.80)                | 0.91 (0.64, 1.31)   |
| <50                                                 | 4.41 (2.38, 8.18) *              | 2.59 (1.60, 4.18) *  | 3.88 (2.02, 7.45) *              | 2.25 (1.35, 3.74) * |                                  |                     | 1.32 (0.74, 2.34)                | 1.13 (0.72, 1.76)   |
| Vasopressors/inotropes on KRT day 1                 |                                  |                      |                                  |                     |                                  |                     |                                  |                     |
| 0                                                   | Ref                              | Ref                  | Ref                              | Ref                 |                                  |                     | Ref                              | Ref                 |
| 1                                                   | 1.16 (0.79, 1.70)                | 1.26 (0.90, 1.78)    | 1.12 (0.73, 1.73)                | 1.09 (0.75, 1.58)   |                                  |                     | 0.97 (0.62, 1.51)                | 0.93 (0.63, 1.37)   |
| ≥2                                                  | 1.92 (1.22, 3.01) *              | 2.30 (1.55, 3.42) *  | 1.41 (0.83, 2.38)                | 1.82 (1.17, 2.83) * |                                  |                     | 1.09 (0.63, 1.88)                | 1.32 (0.84, 2.07)   |
| Major cardiac event prior to or on KRT day 1        | 2.41 (1.02, 5.71) *              | 2.63 (1.27, 5.45) *  | 2.11 (0.82, 5.47)                | 2.36 (1.08, 5.15) * |                                  |                     | 1.03 (0.38, 2.75)                | 1.13 (0.59, 2.15)   |
| Steroid administration prior to or on KRT day 1     | 1.57 (1.10, 2.25) *              | 2.08 (1.51, 2.87) *  |                                  |                     |                                  |                     | 1.02 (0.68, 1.52)                | 1.44 (1.02, 2.03) * |
| Tocilizumab administration prior to or on KRT day 1 | 0.81 (0.54, 1.21)                | 0.78 (0.55, 1.12)    |                                  |                     |                                  |                     | 0.98 (0.61, 1.55)                | 0.93 (0.62, 1.39)   |
| Remdesivir administration prior to or on KRT day 1  | 0.88 (0.46, 1.69)                | 1.17 (0.64, 2.14)    |                                  |                     |                                  |                     | 0.92 (0.39, 2.18)                | 1.09 (0.55, 2.17)   |
| Mechanical ventilation on KRT day 1                 | 2.07 (1.03, 4.17) *              | 5.74 (2.73, 12.07) * |                                  |                     |                                  |                     | 0.92 (0.39, 2.19)                | 1.35 (0.61, 2.99)   |
| Platelets (x10 <sup>3</sup> /μL)                    |                                  |                      |                                  |                     |                                  |                     |                                  |                     |
| 150+                                                | Ref                              | Ref                  |                                  |                     |                                  |                     | Ref                              | Ref                 |
| 100-149                                             | 1.44 (0.85, 2.44)                | 1.69 (1.06, 2.70) *  |                                  |                     |                                  |                     | 1.02 (0.53, 1.94)                | 1.12 (0.69, 1.81)   |
| <100                                                | 3.51 (1.38, 8.91) *              | 3.70 (1.73, 7.90) *  |                                  |                     |                                  |                     | 1.05 (0.36, 3.04)                | 1.15 (0.61, 2.15)   |
| Bilirubin (mg/dL)                                   |                                  |                      |                                  |                     |                                  |                     |                                  |                     |
| <1.2                                                | Ref                              | Ref                  |                                  |                     |                                  |                     | Ref                              | Ref                 |
| 1.2-1.9                                             | 1.27 (0.78, 2.05)                | 1.67 (1.07, 2.59) *  |                                  |                     |                                  |                     | 0.93 (0.56, 1.52)                | 1.24 (0.79, 1.93)   |
| 2.0+                                                | 1.60 (0.89, 2.89)                | 2.02 (1.19, 3.43) *  |                                  |                     |                                  |                     | 0.96 (0.47, 1.97)                | 1.22 (0.72, 2.06)   |

Each cell displays OR (95% CI) p-value.

\* p < 0.05

eGFR, estimated glomerular filtration rate; KRT, kidney replacement therapy; CKRT, continuous kidney replacement therapy; iHD, intermittent hemodialysis; PD, peritoneal dialysis; UOP, urine output

All outcomes here were assessed upon discharge. "Survival" represents survival to discharge with either recovery or nonrecovery of kidney function.

**Table S3. Cause-specific hazard model**

| Outcome                                             | Univariate          |                     | Primary Multivariable Model |                     | Parsimonious Multivariable Model |                     | Expanded Multivariable Model |                     |
|-----------------------------------------------------|---------------------|---------------------|-----------------------------|---------------------|----------------------------------|---------------------|------------------------------|---------------------|
|                                                     | Recovery            | Death               | Recovery                    | Death               | Recovery                         | Death               | Recovery                     | Death               |
| Age, per decade of life                             | 0.90 (0.79, 1.01)   | 1.12 (1.04, 1.20) * | 0.89 (0.77, 1.02)           | 1.10 (1.02, 1.18) * | 0.88 (0.77, 1.01)                | 1.13 (1.05, 1.22) * | 0.90 (0.78, 1.04)            | 1.09 (1.01, 1.17) * |
| Female                                              | 1.04 (0.77, 1.41)   | 0.94 (0.79, 1.13)   | 1.12 (0.80, 1.57)           | 0.96 (0.79, 1.16)   | 1.07 (0.77, 1.48)                | 0.96 (0.79, 1.15)   | 1.03 (0.72, 1.46)            | 0.99 (0.81, 1.20)   |
| Black race                                          | 1.53 (1.10, 2.13) * | 0.89 (0.74, 1.06)   | 1.75 (1.20, 2.57) *         | 0.93 (0.75, 1.15)   | 1.54 (1.05, 2.24) *              | 0.93 (0.76, 1.15)   | 1.76 (1.19, 2.59) *          | 0.95 (0.77, 1.19)   |
| Hispanic ethnicity                                  | 0.87 (0.59, 1.28)   | 1.03 (0.84, 1.27)   | 1.09 (0.70, 1.72)           | 0.99 (0.77, 1.26)   | 0.95 (0.62, 1.46)                | 1.05 (0.83, 1.33)   | 1.02 (0.64, 1.63)            | 0.99 (0.78, 1.27)   |
| DM                                                  | 1.08 (0.81, 1.44)   | 0.92 (0.79, 1.09)   | 1.07 (0.78, 1.46)           | 0.95 (0.80, 1.13)   | 1.14 (0.84, 1.54)                | 0.91 (0.77, 1.07)   | 1.09 (0.78, 1.50)            | 0.99 (0.84, 1.18)   |
| Baseline eGFR, mL/min/1.73m <sup>2</sup>            |                     |                     |                             |                     |                                  |                     |                              |                     |
| >60                                                 | Ref                 | Ref                 | Ref                         | Ref                 | Ref                              | Ref                 | Ref                          | Ref                 |
| 31-60                                               | 0.95 (0.67, 1.36)   | 1.13 (0.93, 1.37)   | 1.00 (0.68, 1.45)           | 1.17 (0.96, 1.43)   | 1.00 (0.69, 1.43)                | 1.09 (0.89, 1.33)   | 0.92 (0.63, 1.36)            | 1.20 (0.98, 1.47)   |
| 16-30                                               | 0.81 (0.50, 1.32)   | 0.77 (0.57, 1.04)   | 0.77 (0.46, 1.28)           | 0.75 (0.55, 1.02)   | 0.74 (0.45, 1.22)                | 0.77 (0.57, 1.04)   | 0.74 (0.43, 1.25)            | 0.77 (0.56, 1.05)   |
| ≤ 15                                                | 0.31 (0.14, 0.71) * | 0.88 (0.63, 1.21)   | 0.34 (0.14, 0.79) *         | 0.96 (0.68, 1.34)   | 0.31 (0.13, 0.70) *              | 0.88 (0.64, 1.22)   | 0.29 (0.12, 0.69) *          | 1.00 (0.71, 1.40)   |
| Initial mode of KRT, CKRT vs iHD/PD/Other           | 1.20 (0.87, 1.64)   | 0.91 (0.76, 1.08)   | 1.08 (0.76, 1.54)           | 0.87 (0.72, 1.04)   |                                  |                     | 1.21 (0.84, 1.75)            | 0.90 (0.75, 1.09)   |
| Albumin on KRT day 1, per 0.5 (g/dL)                | 1.00 (0.88, 1.14)   | 0.91 (0.85, 0.98) * | 0.96 (0.84, 1.10)           | 0.92 (0.85, 0.99) * |                                  |                     | 0.96 (0.83, 1.11)            | 0.93 (0.86, 1.00)   |
| Arterial pH on KRT day 1, per 0.1                   | 1.13 (0.95, 1.35)   | 0.74 (0.68, 0.80) * | 1.12 (0.94, 1.34)           | 0.77 (0.71, 0.83) * |                                  |                     | 1.05 (0.88, 1.27)            | 0.77 (0.71, 0.84) * |
| UOP on KRT day 1 (mL/day)                           |                     |                     |                             |                     |                                  |                     |                              |                     |
| 500+                                                | Ref                 | Ref                 | Ref                         | Ref                 |                                  |                     | Ref                          | Ref                 |
| 50-499                                              | 0.68 (0.50, 0.93) * | 1.19 (0.98, 1.45)   | 0.66 (0.46, 0.93) *         | 1.00 (0.81, 1.23)   |                                  |                     | 0.62 (0.43, 0.89) *          | 0.97 (0.78, 1.19)   |
| <50                                                 | 0.41 (0.23, 0.74) * | 1.65 (1.30, 2.10) * | 0.41 (0.22, 0.77) *         | 1.51 (1.18, 1.92) * |                                  |                     | 0.41 (0.22, 0.76) *          | 1.45 (1.14, 1.85) * |
| Vasopressors/inotropes on KRT day 1                 |                     |                     |                             |                     |                                  |                     |                              |                     |
| 0                                                   | Ref                 | Ref                 | Ref                         | Ref                 |                                  |                     | Ref                          | Ref                 |
| 1                                                   | 0.77 (0.56, 1.08)   | 1.07 (0.87, 1.33)   | 0.77 (0.54, 1.11)           | 1.02 (0.81, 1.27)   |                                  |                     | 0.87 (0.59, 1.27)            | 0.92 (0.74, 1.16)   |
| ≥2                                                  | 0.70 (0.47, 1.04)   | 1.67 (1.34, 2.09) * | 0.80 (0.51, 1.27)           | 1.49 (1.17, 1.89) * |                                  |                     | 0.89 (0.56, 1.43)            | 1.33 (1.04, 1.69) * |
| Major cardiac event prior to or on KRT day 1        | 0.83 (0.37, 1.88)   | 2.13 (1.58, 2.88) * | 0.70 (0.29, 1.70)           | 2.02 (1.48, 2.76) * |                                  |                     | 0.57 (0.23, 1.42)            | 1.99 (1.45, 2.73) * |
| Steroid administration prior to or on KRT day 1     | 1.09 (0.79, 1.51)   | 1.54 (1.30, 1.82) * |                             |                     |                                  |                     | 1.18 (0.83, 1.67)            | 1.35 (1.13, 1.61) * |
| Tocilizumab administration prior to or on KRT day 1 | 0.94 (0.66, 1.34)   | 0.88 (0.71, 1.10)   |                             |                     |                                  |                     | 0.91 (0.62, 1.35)            | 0.85 (0.68, 1.07)   |
| Remdesivir administration prior to or on KRT day 1  | 1.24 (0.70, 2.18)   | 1.07 (0.77, 1.49)   |                             |                     |                                  |                     | 1.09 (0.58, 2.07)            | 0.93 (0.66, 1.31)   |
| Mechanical ventilation on KRT day 1                 | 0.35 (0.20, 0.62) * | 2.29 (1.22, 4.28) * |                             |                     |                                  |                     | 0.25 (0.12, 0.50) *          | 1.67 (0.87, 3.23)   |
| Platelets (x10 <sup>3</sup> /μL)                    |                     |                     |                             |                     |                                  |                     |                              |                     |
| 150+                                                | Ref                 | Ref                 |                             |                     |                                  |                     | Ref                          | Ref                 |
| 100-149                                             | 1.01 (0.62, 1.62)   | 1.34 (1.05, 1.70) * |                             |                     |                                  |                     | 0.91 (0.53, 1.53)            | 1.46 (1.14, 1.87) * |
| <100                                                | 0.50 (0.21, 1.22)   | 1.54 (1.16, 2.05) * |                             |                     |                                  |                     | 0.52 (0.21, 1.30)            | 1.48 (1.10, 1.99) * |
| Bilirubin (mg/dL)                                   |                     |                     |                             |                     |                                  |                     |                              |                     |
| <1.2                                                | Ref                 | Ref                 |                             |                     |                                  |                     | Ref                          | Ref                 |
| 1.2-1.9                                             | 0.92 (0.60, 1.42)   | 1.25 (1.00, 1.57)   |                             |                     |                                  |                     | 0.85 (0.53, 1.38)            | 1.11 (0.87, 1.41)   |
| 2.0+                                                | 0.81 (0.47, 1.41)   | 1.46 (1.13, 1.87) * |                             |                     |                                  |                     | 0.76 (0.42, 1.37)            | 1.37 (1.04, 1.80) * |

Each cell displays HR (95% CI) p-value.

\* p < 0.05

eGFR, estimated glomerular filtration rate; KRT, kidney replacement therapy; CKRT, continuous kidney replacement therapy; iHD, intermittent hemodialysis; PD, peritoneal dialysis; UOP, urine output
